# Supplementary material for: Co-Translational Insertion of Aquaporins into Liposome for Functional Analysis via an E. coli Based Cell-Free Protein Synthesis System
Source: MDPI journal article supplement (doi:10.3390/cells8111325), 2019-10-27
Supplement: s1 [file s1]

Supplementary information:

## **Co-Translational Insertion of Aquaporins into Liposome for Functional Analysis via an *E. coli* Based Cell-Free Protein Synthesis System**

**Ke Yue <sup>1</sup>, Tran Nam Trung <sup>2</sup>, Yiyong Zhu <sup>3</sup>, Ralf Kaldenhoff <sup>2</sup> and Lei Kai <sup>1,2,4,\*</sup>**

<sup>1</sup> The Key Laboratory of Biotechnology for Medicinal Plants of Jiangsu Province, School of Life Sciences, Jiangsu Normal University, Xuzhou 22116, China; [kyue@jsnu.edu.cn](mailto:kyue@jsnu.edu.cn)

<sup>2</sup> Department of Biology, Applied Plant Sciences, Technische Universität Darmstadt, Schnittspahn Strasse 10, D-64287 Darmstadt, Germany; [tran@bio.tu-darmstadt.de](mailto:tran@bio.tu-darmstadt.de) (T.N.T.); [kaldenhoff@bio.tu-darmstadt.de](mailto:kaldenhoff@bio.tu-darmstadt.de) (R.K.)

<sup>3</sup> Jiangsu Provincial Key Lab for Organic Solid Waste Utilization, National Engineering Research Center for Organic-based Fertilizers, Jiangsu Collaborative Innovation Center for Solid Organic Waste Resource Utilization, Nanjing Agricultural University, Nanjing 210095, China; [yiyong1973@njau.edu.cn](mailto:yiyong1973@njau.edu.cn)

<sup>4</sup> Department of Cellular and Molecular Biophysics, Max Planck Institute of Biochemistry, D-82152 Martinsried, Germany

\* Correspondence: [lkai@jsnu.edu.cn](mailto:lkai@jsnu.edu.cn) or [kai@biochem.mpg.de](mailto:kai@biochem.mpg.de); Tel.: +49-(0)89-8578-2319

### Solubilization of liposome via detergents

Titration experiments were performed for liposomes prepared from L- $\alpha$ -Phosphatidylcholine using  $\beta$ -OG (20%) and TritonX-100 (5%). Optical density at 436 nm was used for lipid-detergent interaction determination according to previously reported [1].

Titration of OG and TX-100 was performed by adding  $\beta$ -OG (20%) or TX-100 (5%) solutions to 200  $\mu$ L suspension of liposome (4 mg/mL in Assay buffer A) in increments of 2  $\mu$ L. OD<sub>436nm</sub> was measured immediately after each step. Titration curves were generated by plotting detergent-to-lipid ratios against corresponding OD<sub>436nm</sub>. Detergent working concentration was chosen as the point at which liposomes were completely solubilized and OD<sub>436nm</sub> reduced to almost zero. Titration curves were shown in Figure S1.

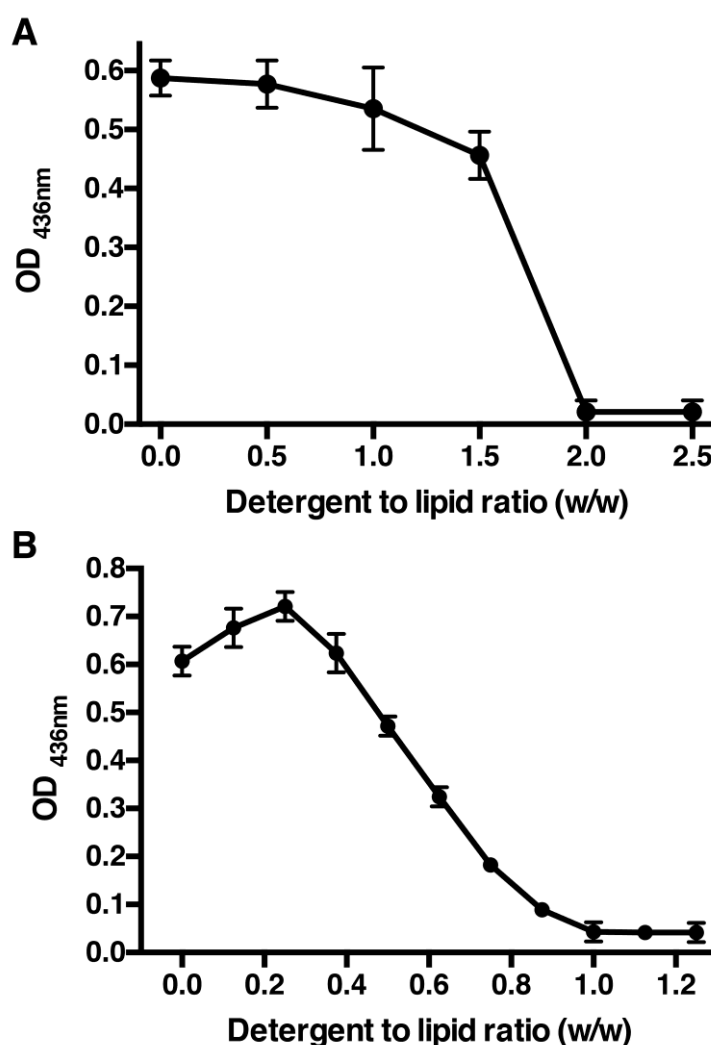

Figure S1. Titration of liposome with detergents. A, titration with  $\beta$ -OG B, titration with TritonX-100.

**Reference:**

1. Matsuzaki, K.; Murase, O.; Sugishita, K.; Yoneyama, S.; Akada, K.; Ueha, M.; Nakamura, A.; Kobayashi, S. Optical characterization of liposomes by right angle light scattering and turbidity measurement. *Biochim. Biophys. Acta* **2000**, *1467*, 219-226.
